# Supplementary material
Source: publisher figshare collection journal article supplement (https://karger.figshare.com/ndownloader/files/36428478)
Supplement: Supplementary file 1 [file 36428478]

**Supplement S7: Categorial confounding factors on left ventricular stroke volume (LV-SV) bias**

|  | n | mean bias  (EC-TTE)  (m) | standard deviation  (SD) | limits of agreement  (m ± 1.96*SD) | p-value |
| --- | --- | --- | --- | --- | --- |
| Gestational age category |  |  |  |  | .155 |
| < 28 weeks | 21 | 0.24 | (0.28) | -0.31 to 0.79 |  |
| ≥ 28 weeks | 23 | 0.44 | (0.47) | -0.48 to 1.36 |  |
| Birthweight category |  |  |  |  | .020 |
| ≤ 1000g | 24 | 0.21 | (0.29) | -0.35 to 0.78 |  |
| > 1000g | 20 | 0.51 | (0.45) | -0.38 to 1.40 |  |
| Postnatal age category |  |  |  |  | .218 |
| Day 1 | 22 | 0.43 | (0.40) | -0.35 to 1.20 |  |
| Day 2 | 22 | 0.28 | (0.39) | -0.48 to 1.04 |  |
| Presence of PDA |  |  |  |  | .674 |
| No | 12 | 0.41 | (0.28) | -0.14 to 0.96 |  |
| Yes | 32 | 0.34 | (0.44) | -0.52 to 1.19 |  |
| Presence of hsPDA |  |  |  |  | .087 |
| No | 35 | 0.40 | (0.41) | -0.40 to 1.20 |  |
| Yes | 9 | 0.10 | (0.25) | -0.39 to 0.59 |  |
| Respiratory support during measurement |  |  |  |  | .589 |
|  |  |  |  |  |
| IPPV | 15 | 0.30 | (0.30) | -0.30 to 0.90 |  |
| CPAP/HFNC | 22 | 0.42 | (0.48) | -0.53 to 1.36 |  |
| None | 7 | 0.23 | (0.25) | -0.26 to 0.72 |  |

n, mean (standard deviation SD), limits of agreement (LoA) of left ventricular (LV) stroke volume (SV) PDA patent ductus arteriosus (hs hemodynamic significant), IPPV invasive intermittent positive pressure ventilation, non-invasive respiratory support with continuous positive airway pressure (CPAP) or high flow nasal canula (HFNC)
